# Emerging Concepts in the Pathology and Molecular Biology of Advanced Non-Small Cell Lung Cancer

Peter Kulesza, MD, PhD, Kavitha Ramchandran, MD, and Jyoti D. Patel, MD

**Key Words:** Non-small cell lung cancer; Epidermal growth factor receptor; Tyrosine kinase inhibitors; Afatinib (BIBW 2992); Gefitinib; Erlotinib

DOI: 10.1309/AJCPO66OIRULFNLZ

## Abstract

*Non-small cell lung cancer (NSCLC) is traditionally classified histologically, but until recently, the histologic subtype has had little impact on the selection of therapy. Drugs such as pemetrexed and bevacizumab are indicated for specific NSCLC subtypes, and this type of stratification represents the first step toward individualizing therapy in NSCLC. Beyond histologic features, the status of molecular targets, such as the epidermal growth factor receptor (EGFR) gene, has been shown to correlate with response to treatment with EGFR tyrosine kinase inhibitors in patients with relapsed or refractory disease and in the first-line therapy setting. New therapies targeting the EGFR and other molecular aberrations are under way to help define specific subsets of patients responsive to certain molecularly targeted treatments. The role of pathologists in guiding treatment decisions will increase because molecular profiling, together with pathologic and histologic analysis, represents the future of personalizing medicine for patients with NSCLC.*

Ideally, a tumor classification system should have predictive value; that is, it should provide information to influence therapeutic decision making and elucidate morphologic distinctions between tumor types.<sup>1</sup> The World Health Organization tumor classification system **Table 1** provides a basis for comprehensive diagnosis and provides a guide for therapeutic decisions.<sup>2,3</sup> Non-small cell lung cancer (NSCLC) is a heterogeneous aggregate of histologic subtypes, which traditionally have been grouped together because of similarities of treatment and outcome.<sup>4</sup> Pathologists have been classifying NSCLC by histologic subtype, most broadly into adenocarcinoma, squamous cell carcinoma, and “others.”

Adenocarcinoma is the most frequently occurring subtype, constituting approximately 40% of all NSCLCs, with squamous cell carcinoma close behind, and “others” representing the remaining cases.<sup>5</sup> Refinements of the classification system have been made, such as distinct separation of bronchioloalveolar carcinoma (BAC) as a noninvasive lesion based on correlation of outcome to H&E staining features and the recognition of neuroendocrine origin within large cell carcinoma, based mostly on immunohistochemical markers.<sup>2</sup> The significance of these findings has been mostly prognostic, as considered in the narrow sense of indicating the lesions’ innate behavior, rather than predictive, indicating the lesions’ response to a therapeutic intervention. Thus, for many years, the histologic subtype was not taken into account in the management of patients with NSCLC.

Recently, however, histologic subtype has become an important consideration when selecting therapy. In 2009, for the first time, the National Comprehensive Cancer Network (NCCN) issued guidelines that include histologic subtype as a factor for recommending specific treatment options.<sup>6</sup> For

**Table 1**  
**Histologic Classification of Lung Epithelial Neoplasms<sup>2,3</sup>**

| Histologic Type                  | Variant                                                                                                                                                                                                                                                                                                             |
|----------------------------------|---------------------------------------------------------------------------------------------------------------------------------------------------------------------------------------------------------------------------------------------------------------------------------------------------------------------|
| Squamous cell carcinoma          | Papillary<br>Clear cell<br>Small cell                                                                                                                                                                                                                                                                               |
| Adenocarcinoma                   | Basaloid<br>Mixed<br>Bronchioloalveolar<br>Mucinous<br>Nonmucinous<br>Mixed<br>Indeterminate<br>Acinar<br>Papillary<br>Solid adenocarcinoma with mucin production<br>Fetal adenocarcinoma<br>Mucinous "colloid" carcinoma<br>Mucinous cystadenocarcinoma<br>Signet-ring adenocarcinoma<br>Clear cell adenocarcinoma |
| Adenosquamous carcinoma          |                                                                                                                                                                                                                                                                                                                     |
| Large cell carcinoma             | Large cell neuroendocrine carcinoma<br>Basaloid carcinoma<br>Lymphoepithelioma-like carcinoma<br>Clear cell carcinoma<br>Large cell carcinoma with rhabdoid features                                                                                                                                                |
| Small cell carcinoma             | Combined small cell carcinoma                                                                                                                                                                                                                                                                                       |
| Sarcomatoid carcinoma            | Pleomorphic carcinoma<br>Spindle cell carcinoma<br>Giant cell carcinoma<br>Carcinosarcoma<br>Pulmonary blastoma<br>Others                                                                                                                                                                                           |
| Carcinoid tumor                  | Typical carcinoid<br>Atypical carcinoid                                                                                                                                                                                                                                                                             |
| Carcinoma of salivary-gland type | Mucoepidermoid carcinoma<br>Adenoid cystic carcinoma<br>Epithelial-myoepithelial carcinoma                                                                                                                                                                                                                          |
| Preinvasive lesions              | Squamous carcinoma in situ<br>Atypical adenomatous hyperplasia<br>Diffuse idiopathic pulmonary neuroendocrine cell hyperplasia                                                                                                                                                                                      |

example, based on the results of pivotal phase 3 clinical trials, pemetrexed, alone or in combination with cisplatin, is indicated only for patients with advanced disease (chemotherapy-naive or chemotherapy-treated) and nonsquamous histology.<sup>7-9</sup> Bevacizumab (Avastin, Genentech, South San Francisco, CA), in combination with carboplatin and paclitaxel, is not recommended for patients with squamous cell carcinoma because pulmonary hemorrhage occurs with greater frequency with bevacizumab in patients with this histologic subtype.<sup>10</sup> Results such as these have served as a guide in personalizing therapy for patients with lung cancer.

Morphologic examination of tumor biopsy specimens is essential to NSCLC diagnosis and staging and is the first step toward personalizing treatment. To more accurately classify NSCLC subtypes, additional methods can be and are used. The next section discusses 2 markers that have revolutionized

the impact of pathologists' assessment of tumor tissue and are likely examples of how diagnostics will evolve in the future.

## Epidermal Growth Factor Receptor and V-Ki-ras2 Kirsten Rat Sarcoma Viral Oncogene Homolog

Evaluating appropriate molecular targets is the next step in making clinical diagnoses that will help to individualize therapy. The significant association between certain epidermal growth factor receptor (*EGFR*) mutations, especially exon 19 deletions, and clinical benefit in response to treatment with *EGFR* tyrosine kinase inhibitors (TKIs) is well established in patients with relapsed or refractory disease. However, increasing evidence suggests that such molecular selection is warranted earlier in the course of treatment **Table 2**.<sup>11-34</sup> IPASS, a phase III trial, compared gefitinib (Iressa, AstraZeneca, Wilmington, DE) with standard chemotherapy for the first-line treatment of advanced NSCLC with adenocarcinoma histologic features in patients who were light or never smokers.<sup>31</sup> The study included more than 1,200 patients, with a retrospective biomarker analysis performed on specimens from 437 patients with evaluable *EGFR* mutation data.<sup>31</sup> Mutations in the *EGFR* gene were identified in 261 (59.7%) of these patients. Among this subgroup, progression-free survival (PFS) was significantly longer in the patients who received gefitinib compared with patients who received carboplatin/paclitaxel (hazard ratio [HR] for progression or death, 0.48; 95% confidence interval [CI], 0.36-0.64;  $P < .001$ ). Furthermore, the mutation-negative patients experienced significantly diminished PFS with gefitinib compared with carboplatin/paclitaxel (HR for progression, 2.85; 95% CI, 2.05-3.98;  $P < .001$ ). In a retrospective analysis, increased PFS was also observed in patients with *EGFR*-mutation-positive tumors who received first- or second-line gefitinib monotherapy.<sup>35</sup>

The role of *EGFR* mutational status in helping patients achieve prolonged clinical benefit in response to *EGFR* TKI therapy seems to extend to the maintenance therapy setting as well. The phase 3 SATURN study was designed to compare the effects of erlotinib (Tarceva, Genentech) and placebo in patients with advanced NSCLC who had experienced clinical benefit (response or disease stabilization) after 4 cycles of standard platinum-based chemotherapy.<sup>34</sup> Biomarker analyses, including determination of *EGFR* mutation status, were performed. PFS was significantly prolonged with erlotinib compared with placebo in all patients (HR, 0.71; 95% CI, 0.62-0.82;  $P < .0001$ ).<sup>34</sup> Response rates (11.9% vs 5.4%) and disease control rates (objective response plus stable disease >12 weeks, 40.8% vs 27.4%;  $P < .0001$ ) were also improved with erlotinib.<sup>34</sup> Significantly prolonged PFS was

**Table 2**  
**Summary of Key Clinical Trials Testing the Effect of EGFR Mutational Status on Response to EGFR Tyrosine Kinase Inhibitor Therapy**

| Trial Name              | Agent     | EGFR-Mutation Findings                                                                                                                                                                                     |                                                                                                                 | Reference                                                                                         |
|-------------------------|-----------|------------------------------------------------------------------------------------------------------------------------------------------------------------------------------------------------------------|-----------------------------------------------------------------------------------------------------------------|---------------------------------------------------------------------------------------------------|
|                         |           | Positive                                                                                                                                                                                                   | Negative                                                                                                        |                                                                                                   |
| ≥Second-line therapy    |           |                                                                                                                                                                                                            |                                                                                                                 |                                                                                                   |
| —                       | Gefitinib | RR, 100% (5/5)                                                                                                                                                                                             | RR, 0% (0/4); <i>P</i> = .0027                                                                                  | Paez et al, <sup>11</sup> 2004                                                                    |
| —                       | Erlotinib | RR, 71% (5/7)                                                                                                                                                                                              | RR, 0% (0/10); <i>P</i> = .003                                                                                  | Pao et al, <sup>12</sup> 2004                                                                     |
| —*                      | Gefitinib | RR, 100% (8/8)                                                                                                                                                                                             | RR, 13% (1/8); <i>P</i> < .001                                                                                  | Lynch et al, <sup>13</sup> 2004                                                                   |
| ISEL                    | Gefitinib | ORR, 38% (6/16)                                                                                                                                                                                            | ORR, 2.6% (3/116)                                                                                               | Thatcher et al, <sup>14</sup> 2005;<br>Hirsch et al, <sup>15</sup> 2006                           |
| BR.21                   | Erlotinib | RR, 27% (4/15); HR for OS, 0.77 (95% CI, 0.40-1.50); <i>P</i> = .45 <sup>†</sup>                                                                                                                           | RR, 6.9% (7/101); <i>P</i> = .03; HR for OS, 0.73 (95% CI, 0.49-1.10); <i>P</i> = .13 <sup>†</sup>              | Shepherd et al, <sup>16</sup> 2005; Tsao et al, <sup>17</sup> 2005; Zhu et al, <sup>18</sup> 2008 |
| —*                      | Gefitinib | RR, 65% (11/17; 95% CI, 42.0%-87.4%); TTP, 21.7 mo; HR for TTP, 0.23 (95% CI, 0.093-0.57); OS, 30.5 mo; HR for OS, 0.16 (95% CI, 0.046-0.52)                                                               | RR, 14% (10/73; 95% CI, 5.8%-21.6%); <i>P</i> < .001; TTP, 1.8 mo; <i>P</i> < .001; OS, 6.6 mo; <i>P</i> < .001 | Han et al, <sup>19</sup> 2005                                                                     |
| INTEREST                | Gefitinib | OS, 14.2 mo                                                                                                                                                                                                | OS, 6.4 mo; <i>P</i> = .59                                                                                      | Kim et al, <sup>20</sup> 2008                                                                     |
| V-15-32                 | Gefitinib | ORR, 67% (6/9)<br>PFS, HR for mutation-positive vs mutation-negative, 0.33 (95% CI, 0.11-0.97)                                                                                                             | ORR, 0% (0/26)                                                                                                  | Maruyama et al, <sup>21</sup> 2008                                                                |
| —                       | Erlotinib | RR, 83% (15/18; 95% CI, 65%-94%); PFS, 13 mo; OS, 23 mo                                                                                                                                                    | RR, 6% (4/63); <i>P</i> < .01; PFS, 2 mo; <i>P</i> < .01; OS, 17 mo; <i>P</i> = .24                             | Miller et al, <sup>22</sup> 2008                                                                  |
| LUX-Lung 2 <sup>‡</sup> | Afatinib  | ORR, 60.5% <sup>§</sup> (78/129)                                                                                                                                                                           | NA, EGFR-mutation-selected patient population                                                                   | Yang et al, <sup>23</sup> 2010                                                                    |
| First-line therapy      |           |                                                                                                                                                                                                            |                                                                                                                 |                                                                                                   |
| —                       | Erlotinib | RR, 80% (4/5); OS, >627 d                                                                                                                                                                                  | RR, 5% (1/22); OS, 377 d; <i>P</i> = .15                                                                        | Giaccone et al, <sup>24</sup> 2006                                                                |
| ONCOBELL                | Gefitinib | RR, 63% (15/24); median OS, NR                                                                                                                                                                             | RR, 23% (3/13); <i>P</i> = .02; median OS, 11.1 mo; <i>P</i> = .5                                               | Cappuzzo et al, <sup>25</sup> 2007                                                                |
| WJTOG 0403              | Gefitinib | RR, 75% (21/28; 95% CI, 57.6%-91.0%); PFS, 11.5 mo (95% CI, 7.3-NR); median OS, NR; 1-y OS, 79% (22/28; 95% CI, 63.4%-93.8%)                                                                               | NA, EGFR-mutation-selected patient population                                                                   | Tamura et al, <sup>26</sup> 2008                                                                  |
| —                       | Gefitinib | RR, 69% (38/55); median TTP, 8 mo; median OS, 24 mo                                                                                                                                                        | RR, 20% (7/35); median TTP, 3.4 mo; median OS, 12.9 mo                                                          | Yang et al, <sup>27</sup> 2008                                                                    |
| —                       | Gefitinib | RR, 63% (12/19; 95% CI, 38.4%-83.7%); PFS, 7.1 mo; median OS, 20 mo                                                                                                                                        | NA, EGFR-mutation-selected patient population                                                                   | Sugio et al, <sup>28</sup> 2009                                                                   |
| —                       | Gefitinib | RR, 55% (17/31; 95% CI, 33.0%-70.0%); PFS, 9.2 mo (95% CI, 6.2-11.8); median OS, 17.5 mo (95% CI, 13.5-21.3)                                                                                               | NA, EGFR-mutation-selected patient population                                                                   | Sequist et al, <sup>29</sup> 2008                                                                 |
| TRUST <sup>  </sup>     | Erlotinib | RR, 50% (2/4)<br>HR for PFS mutation-positive vs mutation-negative, 0.31 (95% CI, 0.13-0.78); <i>P</i> = .009; HR for OS mutation-positive vs mutation-negative, 0.33 (95% CI, 0.12-0.91); <i>P</i> = .025 | RR, 3% (2/68); <i>P</i> = .014                                                                                  | Schneider et al, <sup>30</sup> 2008                                                               |
| IPASS                   | Gefitinib | ORR, 71.2%; HR for OS, 0.78 (95% CI, 0.50-1.20); HR for PFS, 0.48 (95% CI, 0.36-0.64)                                                                                                                      | ORR, 1.1%; HR for OS, 1.38 (95% CI, 0.92-2.09); HR for PFS, 2.85 (95% CI, 2.05-3.98)                            | Mok et al, <sup>31</sup> 2009                                                                     |
| First-SIGNAL            | Gefitinib | PFS, 8.4 mo; OS, 30.6 mo                                                                                                                                                                                   | PFS, 2.1 mo; OS, 18.4 mo                                                                                        | Lee et al, <sup>32</sup> 2009                                                                     |
| —                       | Gefitinib | ORR, 66% (95% CI, 51%-80%); median PFS, 6.5 mo; median OS, 17.8 mo                                                                                                                                         | NA, EGFR-mutation-selected patient population                                                                   | Inoue et al, <sup>33</sup> 2009                                                                   |
| Maintenance therapy     |           |                                                                                                                                                                                                            |                                                                                                                 |                                                                                                   |
| SATURN                  | Erlotinib | PFS, HR, 0.1 (95% CI, 0.04-0.25); <i>P</i> < .0001                                                                                                                                                         | PFS, HR, 0.78 (95% CI, 0.63-0.96); <i>P</i> = .0185                                                             | Cappuzzo et al, <sup>34</sup> 2010                                                                |

CI, confidence interval; EGFR, epidermal growth factor receptor; HR, hazard ratio; NA, not available; NR, not reported; ORR, objective response rate; OS, overall survival; PFS, progression-free survival; RR, response rate; TTP, time to progression.

\* Also included patients receiving first-line therapy.

† The comparison group is placebo.

‡ Interim analysis of pivotal phase 2 trials.

§ Investigator-determined response.

|| Also included patients receiving second- and third-line therapy.

observed with erlotinib in patients whose tumors had *EGFR* mutations (HR, 0.10; 95% CI, 0.04-0.25;  $P < .0001$ ) and in patients whose tumors bore wild-type (WT) *EGFR* (HR, 0.78; 95% CI, 0.63-0.96;  $P = .0185$ ).<sup>34</sup>

Amplification of the *EGFR* gene also has been shown to correlate with response to EGFR TKIs. In patients with advanced NSCLC, an increased *EGFR* gene copy number (GCN), as measured by fluorescence in situ hybridization (FISH), predicted improved survival and/or response to gefitinib<sup>25,36,37</sup> and erlotinib.<sup>17,18</sup> In a biomarker analysis from the randomized phase 3 BR.21 trial, which compared erlotinib with placebo in the second-line NSCLC setting, 61 (38.4%) of 159 tumors analyzed were positive for an increased *EGFR* GCN.<sup>18</sup> Response rates were 21% and 5% in patients who were positive and negative for increased *EGFR* GCN, respectively ( $P = .02$ ). This benefit seemed to extend to survival (HR, 0.43;  $P = .004$ ). In a multivariate analysis, an increased *EGFR* GCN showed a significant prognostic association with poorer survival ( $P = .025$ ) and differential survival benefit with erlotinib ( $P = .005$ ). Taken together, these data suggest that in addition to *EGFR* mutational status, an increased *EGFR* GCN may also influence patient response to EGFR TKIs.

The role of Kirsten rat sarcoma viral oncogene homolog (*KRAS*) testing in patients with NSCLC remains controversial. *KRAS* is a downstream effector of the EGFR pathway. The *KRAS* gene is mutated in approximately 20% to 30% of NSCLCs, principally in patients with lung adenocarcinomas and patients with a history of smoking.<sup>38,39</sup> *KRAS* mutations are associated with intrinsic TKI resistance; patients with mutated *KRAS* experience better PFS with chemotherapy than with EGFR TKI therapy. This finding is not surprising, because *KRAS* mutations have been shown to be a poor predictor of response to EGFR inhibitor therapy in patients with NSCLC.<sup>18,38-44</sup> However, a subgroup analysis of 90 patients in the SATURN study who had the *KRAS* mutation showed no significant difference in PFS between patients treated with erlotinib vs placebo (HR, 0.77; 95% CI, 0.50-1.19;  $P = .2246$ ).<sup>45</sup> Although *KRAS* mutation has been associated with clinical outcomes with cetuximab in colorectal cancer,<sup>46</sup> no association was reported from analyses of multiple trials of cetuximab in combination with chemotherapy in patients with NSCLC.<sup>44,47</sup> *KRAS* testing continues to evolve, and the clinical implications of *KRAS* mutations will likely remain an active area of research until the significance of these genetic abnormalities is elucidated.

Testing for *EGFR* mutations and/or gene amplification and *KRAS* mutations is recognized in the current NCCN guidelines; however, it is unclear whether this testing should be routine for all lung cancers because the prevalence of *EGFR* mutations is low in patients with a history of heavy smoking,<sup>48</sup> and approximately 90% of lung cancers

in men and 80% of lung cancers in women are caused by exposure to cigarette smoke.<sup>49</sup> According to the NCCN guidelines, the purposes of pathologic evaluation include not only classification of the lung cancer by histologic and immunohistochemical studies but also the determination of molecular aberrations that may predict for sensitivity or resistance to EGFR TKIs.<sup>50</sup> The NCCN recognizes that the presence of *EGFR*-activating mutations represents a “critical” biomarker for appropriate patient selection for therapy. As such, in the first-line therapy setting, erlotinib, with or without chemotherapy, should be considered for patients with known *EGFR* activation mutations or gene amplification. The guidelines further recognize that, in many studies, *KRAS* mutations have been shown to be associated with resistance to EGFR TKI therapy; as such, they may be a useful marker in the selection of patients for EGFR TKI therapy. For patients with known *KRAS* mutations, therapy other than erlotinib should be considered in the first-line setting.<sup>50</sup>

In the absence of *EGFR* mutation status, the overexpression of EGFR protein levels as detected by immunohistochemical studies may, in combination with *EGFR* GCN analyses, enhance the selection of patients who may respond best to EGFR TKI therapy. Hirsch and colleagues<sup>37</sup> studied a number of genetic characteristics in tumor specimens from 204 patients with NSCLC treated with the first-generation EGFR TKI, gefitinib. They observed that increased EGFR protein expression, detected by immunohistochemical studies, and increased *EGFR* GCN, as assessed by FISH, predict patients likely to respond to gefitinib; the cohort of patients who were *EGFR* FISH+ and positive immunohistochemically for EGFR showed an overall response rate of 41% and a 1-year survival rate of 77%. In contrast, only 2% of patients with specimens negative for *EGFR* FISH and negative immunohistochemically for EGFR responded to gefitinib; their median survival was 6 months, with a 1-year survival rate of only 30%. Based on these data, Hirsch and colleagues<sup>37</sup> recommend that patients with negative results not receive EGFR TKI therapy.

In the SATURN trial described earlier, maintenance therapy with erlotinib after first-line platinum-based chemotherapy resulted in significantly prolonged PFS as compared with placebo among patients with NSCLC whose tumors showed EGFR overexpression by immunohistochemical analysis (HR, 0.69; 95% CI, 0.58-0.82;  $P < .0001$ ).<sup>34</sup> However, the predictive usefulness of EGFR protein expression as evaluated immunohistochemically may not be consistent. Several studies have found that EGFR protein expression measured immunohistochemically does not correlate significantly with response to EGFR TKI therapy or survival.<sup>22,51,52</sup> For example, in their series of 101 patients with BAC or adenocarcinoma with BAC who had received no more than 1 prior chemotherapy regimen, Miller and colleagues<sup>22</sup> found that improved response rate

and prolonged survival with erlotinib correlated with *EGFR* mutations, but *EGFR* immunohistochemical status provided no predictive information.

## Tissue Acquisition

According to the NCCN, the initial evaluation of a patient with suspected NSCLC requires a complete pathologic review to classify the lung cancer, determine the extent of the invasion, establish the involvement of surgical margins, and identify molecular abnormalities to predict sensitivity to targeted therapies.<sup>50</sup> Many patients have advanced disease at diagnosis; for them, surgery with curative intent is not an option. If metastatic or locally advanced disease is present, the patient must undergo tissue sampling to confirm the diagnosis and provide tissue for molecular characterization.

There are several ways to obtain tissue for diagnostic and biomarker analyses in patients suspected of having NSCLC. According to the American College of Chest Physicians, fine-needle aspiration (FNA) or core-needle biopsy of a metastatic site will help confirm the diagnosis and stage, but in some cases, the metastatic site may be technically difficult to biopsy.<sup>53</sup> If biopsy of the suspected metastatic site is not feasible, sputum cytology, bronchoscopy, or transthoracic needle aspiration of the primary lung lesion can be used to confirm the diagnosis.<sup>53</sup> According to the NCCN, core needle, endobronchial, or transbronchial biopsy may be performed as well.<sup>50</sup>

There is considerable variability in the success rates for acquiring the correct amount of tissue on which to perform these tests. For example, in the BR.21 trial, 328 (69.5%) of 472 patients who consented to *EGFR* testing on biopsied tissue had usable tissue for the determination of *EGFR* mutational status or GCN.<sup>17</sup> The success rates for these tests were 89.8% (177/197 samples) and 56.6% (125/221 samples), respectively. The BATTLE program at the M.D. Anderson Cancer Center, Houston, TX, assessed biomarker-guided treatments in patients with previously treated, advanced NSCLC and biopsy-amenable disease.<sup>54</sup> Fresh core-needle biopsies were required of all enrolled patients, and 11 biomarkers were analyzed. Of 255 randomized patients, 39 had insufficient tissue and 2 had tumors negative for all 11 biomarkers.<sup>54</sup> *EGFR* mutations, *EGFR* GCN, and *KRAS* and *BRAF* mutations, among others, were examined as biomarkers in this study, and significant correlations were observed with specific biomarker results in the treatment groups.<sup>54</sup> Based on these results, it seems that with improved technique and routine use, adequate tissue for biomarker analyses can be acquired in most cases and may be used to guide treatment choice.

The size of the needle used to obtain biopsy specimens may also affect the tissue yield and potential complications. The use of smaller needles (19-gauge or smaller) has become

more frequent.<sup>55</sup> A retrospective review of 846 consecutive procedures demonstrated that pneumothorax occurred more frequently in patients whose computed tomography (CT)-guided transthoracic needle aspirations were performed with 18-gauge needles than in patients who underwent biopsy with 19-gauge needles (38% vs 23%;  $P < .001$ ). However, diagnostic accuracy (malignant vs benign) was similar between the 2 methods (96% vs 92%). More recently, Cheung and colleagues<sup>56</sup> reported lower and similar rates of pneumothorax associated with the use of 18- and 20-gauge needles (12.5% and 13.3%, respectively). Although 18- and 20-gauge needle sizes both provided sufficient samples for *EGFR* mutational analyses, the 18-gauge needle provided specimens that were larger (average, 10.15 vs 9.00 mg) and provided more DNA (average, 47.13 vs 35.92 ng/ $\mu$ L).

An additional benefit of the use of CT-guided needle biopsies is that wash fluid from the needles can provide adequate sample material for highly sensitive DNA analyses. In 1 study, DNA was extracted from the wash fluid of 53 CT-guided needle biopsies of lung tumors.<sup>57</sup> The DNA yield spanned 2 orders of magnitude (range, 35-2,360 ng). DNA analysis of the wash fluid yielded results consistent with those of DNA analyses from tumor specimens. Of the 34 tumors from patients with histologically confirmed NSCLC, *EGFR* exon 19 deletions and L858R activating mutations were observed in 12% and 38% of samples, respectively. In the non-NSCLC samples, no *EGFR* activating mutations were found.

## Histologic Correlates of *EGFR* and *KRAS* Status

Unusually high sensitivity to *EGFR* TKIs (eg, gefitinib and erlotinib) was originally detected in patients with adenocarcinomas, as opposed to other subtypes of NSCLC.<sup>12,13,58</sup> Furthermore, the presence of any BAC features in the specimens conferred this apparent sensitivity; the majority of lesions also displayed activating *EGFR* mutations.<sup>13,58</sup> Sequencing analysis revealed that *EGFR* mutations are present in the nonmucinous histologic subtype, either in adenocarcinomas with BAC features or in pure BAC.<sup>59</sup> The latter finding, in combination with the *EGFR* mutation-based oncogene addiction hypothesis,<sup>60</sup> suggests a molecular basis for consideration of “minimally invasive” BAC as a distinct histopathologic entity. While some studies showed no association between *EGFR* mutations and BAC histologic features in Asian populations,<sup>61,62</sup> another line of evidence emerged that showed an association between *EGFR* mutations and a papillary subtype of adenocarcinoma.<sup>63,64</sup> It is not clear whether the explanation for these observations lies in different population genetics, different classification criteria used by pathologists, or in sampling; the latter 2

explanations have been proposed by some investigators.<sup>63,65</sup> It is also notable that *EGFR* mutations are virtually absent in nonadenocarcinoma NSCLC, such as large cell and squamous cell carcinomas,<sup>66</sup> and are found only if some adenocarcinoma component is present.<sup>67</sup> Reflecting these data, a proposal was made to modify the 2004 World Health Organization lung adenocarcinoma classification to include the histologic pattern of mixed-subtype adenocarcinomas.<sup>63</sup>

In contrast with *EGFR* mutations, which are associated with nonsmoking status and sensitivity to small-molecule *EGFR* inhibitors, most *KRAS* mutations are smoking-related and associated with resistance to *EGFR* TKI therapy.<sup>68</sup> It is interesting that the G to T transversion (smoking-related, present in codon 12) can be found not only in invasive adenocarcinomas but also in hypothetically premalignant adenomatous hyperplasias and BACs.<sup>68,69</sup> While histologically BACs with *EGFR* mutations do not appear distinguishable from those with *KRAS* mutations, the mutations are mutually exclusive, as are the biologic behavior of the lesions and their sensitivity to erlotinib.<sup>40,70</sup> While the significance of *KRAS*<sup>71</sup> as an independent prognostic and predictive marker has been contradictory, 2 large meta-analyses support the association of *KRAS* mutation and lack of effect of *EGFR* TKIs.<sup>72,73</sup> It is also clear that *KRAS* mutations are only rarely found in squamous cell carcinoma of the lung (<5%), and those lesions do not appear histologically distinct.<sup>38,74,75</sup>

## Methods Used to Determine *EGFR* and *KRAS* Mutation Status and Gene Copy Number

The most commonly used technique to detect mutations is direct sequencing of polymerase chain reaction (PCR)-amplified exon sequences. Using this technique, the target DNA sequence is first amplified without selection of mutated vs WT sequence, usually using primers located a few hundred base pairs outside of the putative mutation location. In the second step, the resulting amplified DNA fragment is sequenced directly. Such *EGFR* mutational analysis tests are available from many commercial laboratories (eg, Quest Diagnostics, Madison, NJ; Genzyme Genetics, Westborough, MA).

In all such tests, the issue of specimen purity (eg, the proportion of lesional material to the “contaminating” benign or nonlesional cells) is critical.<sup>76,77</sup> Typical dye-terminator sequencing<sup>78</sup> used in the majority of laboratories requires a minimum of 25% of lesional tissue in the sample because neither the PCR amplification step nor the DNA extension reaction favors the mutant template over WT. This limitation can be circumvented by implementing “single-strand” sequencing analyses available from Solexa (now Illumina, San Diego, CA) or the SOLiD sequencing platform (Applied Biosystems, Carlsbad, CA), in which a single DNA

template is clonally expanded and each individual sequence is read by a high-resolution camera.<sup>79,80</sup> However, the SOLiD technique is currently more expensive than other alternatives. Alternatively, the abnormal sequence can be preferentially extended by using mutated *Taq* enzyme, which has varying affinities for nucleotide terminators; systems that use this technique include the Mutector *KRAS* mutation detection kits (TrimGen Genetic Diagnostics, Sparks, MD).<sup>81</sup>

In addition, technology using reverse transcriptase-PCR (using messenger RNA as the template) has been developed by Response Genetics, Los Angeles, CA, with applicability in a number of malignancies; for example, ResponseDX: Lung may be used to detect expression (eg, *ERCC1* and *EGFR*) and/or mutation of genes (eg, *EGFR* and *KRAS*) in NSCLC.<sup>82,83</sup> Yet another approach is to use methods that “ignore” the WT sequence and preferentially amplify and detect using mutant allele-specific PCR and Scorpion primers (eg, TheraScreen K-RAS and *EGFR*29 mutation kits from QIAGEN Manchester [formerly DxS], Manchester, England).<sup>84,85</sup> The manufacturer of the TheraScreen kits claims that the *EGFR*29 mutation kit can detect 1% of mutant *EGFR* DNA in a background of WT genomic DNA.<sup>86</sup> Sample types that can be studied with this kit include human genomic DNA from fresh, frozen, and paraffin-embedded tissue.<sup>86</sup> Commercial laboratories (eg, Genzyme Genetics and Quest Diagnostics) accept cytologic specimens, such as aspirates and fluids. While such applications have rarely been validated in published studies,<sup>87</sup> they are increasingly used given that FNA samples are often the only diagnostic samples available. As an example of a current application of this technology, the TheraScreen *EGFR*29 mutation kit is currently being used to identify *EGFR* mutations in the LUX-Lung 3 trial (NCT00949650) of afatinib (BIBW 2992) (Boehringer Ingelheim, Ingelheim, Germany).

Mutations can also be identified in DNA obtained from serum and circulating tumor cells. Kimura and colleagues<sup>88</sup> examined 42 pairs of tumor samples and serum DNA for *EGFR* mutations; the identified *EGFR* mutational status in tumor and serum samples was consistent in 93% of cases. Mutational status in cells derived from both sources strongly correlated with response to *EGFR* TKIs ( $P < .001$ ). Circulating tumor cells represent another source of DNA for analysis of *EGFR* mutations. Maheswaran and colleagues<sup>89</sup> identified the expected *EGFR* activating mutations in 11 (92%) of 12 samples obtained. These results suggest that it is feasible to use DNA isolated from serum or circulating tumor cells to detect *EGFR* mutations. Because the procedure to obtain these specimens is only minimally invasive, repeated testing following response to therapy may be possible. However, although this analysis may provide valuable predictive data, circulating tumor cells may be derived from multiple disease sites with different responses to therapy and may not reflect

the status of the primary tumor. Additional studies will be necessary to validate this technique as a diagnostic or predictive tool; the determination of mutational status still requires tissue obtained using core-needle biopsy.

### Other Methods for Assessing EGFR

Fluorescent labeling of nucleic acid probes via FISH allows for the simultaneous detection of multiple chromosomal regions, and use of thin sections of paraffin-embedded blocks maintains tissue architecture and permits correlation of FISH results with histologic findings.<sup>90</sup> A considerable body of data from clinical studies suggests that FISH is a viable method of measuring *EGFR* GCN as a predictive marker for EGFR TKI therapy.<sup>17,18,25,36,37,91</sup> However, controversies remain, and the use of FISH as the preferred technology for *EGFR* amplification may be falling out of favor. The MARVEL study (NCT00738881), which was designed to determine whether patients whose tumors are *EGFR* FISH+ experience greater benefit from EGFR TKI therapy, was recently discontinued owing to slow accrual and a growing consensus that mutational analysis may be more important for guiding therapy.

Chromogenic in situ hybridization (CISH) is a recent modification of FISH that addresses some of the limitations inherent in FISH, including the need for an expensive fluorescent microscope with multi-bandpass filters and the fact that the signal seems to fade within a few weeks.<sup>92,93</sup> CISH permits the use of a conventional bright-field microscope, and results can be observed in the context of tissue morphology when slides are counterstained with hematoxylin.<sup>92,93</sup> Several investigators have confirmed that *EGFR* CISH results show high concordance with FISH.<sup>92-94</sup> In addition, CISH may represent an effective and readily applicable technique for identifying patients with NSCLC likely to respond to EGFR TKI therapy.<sup>95,96</sup> Nevertheless, large-scale validation of CISH in the context of clinical trials is required.

### Emerging New Targets for Personalized Therapy

Defining therapy based on histologic subtype and EGFR status is the beginning of a new era in personalized medicine for patients with NSCLC. As such, new targets are being examined in the hopes that treatments can be individualized further. Human echinoderm microtubule-associated protein like 4 (*EML4*)–anaplastic lymphoma kinase (*ALK*) is a fusion gene created by a small inversion within chromosome 2p. The N-terminal portion is identical to that of human *EML4*, and the C terminus is the same as the intracellular domain of human *ALK*.<sup>97</sup> Two variants of the *EML4-ALK* fusion gene have been characterized, both involving exons 20 to 29 of *ALK* fused to exons 1 to 13 (variant 1) or exons 1 to 20

(variant 2) of *EML4*. Two other variants include fusion points starting at *EML4* exon 6 and exon 18.<sup>98</sup> In mouse models, this fusion gene gives rise to tumors.<sup>97</sup>

Approximately 3% to 7% of patients with NSCLC have the *EML4-ALK* fusion gene,<sup>97,99</sup> which seems to be unique to NSCLC and not present in other solid tumors. It also is seen more commonly in younger, never-, or light-smoking men whose tumors have adenocarcinoma histology, and it is mutually exclusive with *EGFR* and *KRAS* status.<sup>98-102</sup> The characteristics of patients with the *EML4-ALK* fusion gene are similar to those of patients with the *EGFR* mutation. Based on these preliminary studies, *EML4-ALK* may represent a new molecular target in NSCLC. Like *EGFR*, it seems to be specific to certain subpopulations of patients.

Preliminary results suggest that variants of the *EML4-ALK* fusion protein are sensitive to ALK inhibitors. Koivunen and colleagues<sup>101</sup> found that TAE684 (Novartis, Cambridge, MA), a specific ALK inhibitor, inhibits the growth of 1 of 3 (H3122 [*EML4-ALK* variant 1]) *EML4-ALK*-containing cell lines in vitro and in vivo. Recent preliminary results presented at the 13th World Conference on Lung Cancer indicate that another ALK inhibitor, PF-02341066 (Pfizer, New London, CT), which inhibits mesenchymal-epithelial transition factor and ALK, is associated with an overall response rate of 59% (17/29 patients) and a disease control rate of 83% at 8 weeks (24/29 patients).<sup>103</sup> Based on these results, a phase 3 trial has been designed for a select group of patients who have the *EML4-ALK* fusion protein.

Detection of the *EML4-ALK* fusion gene has not been standardized. Several studies have used FISH with a break-apart probe for *ALK*; others have used reverse-transcriptase-PCR. Finally, immunohistochemical analysis has been used as a confirmatory test using a monoclonal antibody against *ALK*.<sup>99,102,104</sup> The optimal methods for detecting the fusion gene and its product, and concordance between techniques, remain active areas of investigation.

### Conclusions

Historically, pathologists have become accustomed to histologic analysis of surgical specimens for the sole purpose of staging the disease. However, the paradigm is shifting because cytologic and needle-biopsy specimens are collected more often and protein and gene analyses assume an ever-increasing role. Routine testing for *EGFR* mutations and/or gene amplification and *KRAS* mutations should become the standard of care for the initial workup of patients newly diagnosed with NSCLC.<sup>105</sup> As the oncology clinician's armamentarium swells with more targeted agents, identification of the people most likely to respond to them will gain in prominence. The role of *EGFR* testing to determine

appropriate treatment will likely increase during the coming years as the nuances regarding response and resistance to current and emerging EGFR-targeted therapies continue to be revealed. To optimize the “personalized medicine” approach to the treatment of patients with NSCLC, *EGFR* mutation testing is critical.

Currently, the NCCN NSCLC guidelines recommend treatment with erlotinib as first-line therapy only in patients whose tumors have *EGFR* mutations, and this criterion may eventually emerge as a requirement for the use of EGFR TKIs in this setting.<sup>50</sup> Pathologists will gain additional responsibility for guiding treatment decisions by determining *EGFR* mutation status and the histologic subtype in patients with NSCLC.

Optimally, multiple 18-gauge core biopsy samples are preferred if they can be obtained safely because they seem to yield the most amount of tissue amenable to molecular analyses. The methods used to detect gene mutations and copy number and the sources from which tissue is obtained are continually being improved. Reduced invasiveness and enhanced sensitivity and specificity will help increase patient compliance with these tests and improve their efficiency, such that routine use may be feasible in the foreseeable future. This type of evaluation necessitates the increased involvement of pathologists in clinical decision making, because the morphologic, immunologic, and gene-based assessments they perform provide invaluable information to help medical oncologists guide treatment.

New targets are being tested, such as the EML4-ALK fusion protein, which further creates a need for pathologists to become familiar with the molecular fingerprints of tumors together with their histologic subtypes and other distinguishing features. The review and interpretation of pulmonary surgical and cytologic specimens provided by pathologists will define the tumor subtype using histologic and molecular characteristics. The clinical outcome data and the evolution of diagnostics suggest that the combination of differentiation and genetic markers to subtype NSCLC and guide treatment decisions is likely to be the next step in personalized medicine.

*From the Robert H. Lurie Comprehensive Cancer Center, Northwestern University, Chicago, IL.*

*Supported by Boehringer Ingelheim Pharmaceuticals Inc (BIPI). The authors received no compensation related to the development of the manuscript.*

*Address reprint requests to Dr Patel: Division of Hematology/Oncology, Feinberg School of Medicine, Northwestern University, Robert H. Lurie Comprehensive Cancer Center, 676 N St Clair, Suite 850, Chicago, IL 60611.*

*Writing and editorial assistance was provided by Leyla Smith, PhD, BlueSpark Healthcare Communications, Basking Ridge, NJ, and Alyssa Tippens, PhD, of MedErgy, Yardley, PA, which were contracted by BIPI for these services. The authors*

*meet criteria for authorship as recommended by the International Committee of Medical Journal Editors, were fully responsible for all content and editorial decisions, and were involved at all stages of manuscript development.*

## References

1. Stancu M, Libbey NP. Pathology of lung carcinoma. In: Weitzberg AB, ed. *Cancer of the Lung: From Molecular Biology to Treatment Guidelines*. Totowa, NJ: Humana Press; 2002.
2. Travis WD, Colby TV, Corrin B, et al. *Histological Typing of Lung and Pleural Tumors*. Berlin, Germany: Springer; 1999.
3. Travis WD, Brambilla E, Müller-Hermelink HK, et al, eds. *WHO Classification of Tumours: Pathology and Genetics of Tumours of the Lung, Pleura, Thymus and Heart*. Lyon, France: IARC Press; 2004.
4. Langer CJ, Besse B, Gualberto A, et al. The evolving role of histology in the management of advanced non-small-cell lung cancer. *J Clin Oncol*. 2010;28:5311-5320.
5. Devesa SS, Bray F, Vizcaino AP, et al. International lung cancer trends by histologic type: male:female differences diminishing and adenocarcinoma rates rising. *Int J Cancer*. 2005;117:294-299.
6. National Comprehensive Cancer Network. NCCN Clinical Practice Guidelines in Oncology: Non-Small Cell Lung Cancer. V.1.2010. [http://www.nccn.org/professionals/physician\\_gls/PDF/nscl.pdf](http://www.nccn.org/professionals/physician_gls/PDF/nscl.pdf). Accessed December 15, 2009.
7. Ciuleanu T, Brodowicz T, Zielinski C, et al. Maintenance pemetrexed plus best supportive care versus placebo plus best supportive care for non-small-cell lung cancer: a randomised, double-blind, phase 3 study. *Lancet*. 2009;374:1432-1440.
8. Scagliotti GV, Parikh P, von PJ, et al. Phase III study comparing cisplatin plus gemcitabine with cisplatin plus pemetrexed in chemotherapy-naïve patients with advanced-stage non-small-cell lung cancer. *J Clin Oncol*. 2008;26:3543-3551.
9. Scagliotti GV, Park K, Patil S, et al. Survival without toxicity for cisplatin plus pemetrexed versus cisplatin plus gemcitabine in chemo-naïve patients with advanced non-small cell lung cancer: a risk-benefit analysis of a large phase III study. *Eur J Cancer*. 2009;45:2298-2303.
10. Johnson DH, Fehrenbacher L, Novotny WF, et al. Randomized phase II trial comparing bevacizumab plus carboplatin and paclitaxel with carboplatin and paclitaxel alone in previously untreated locally advanced or metastatic non-small-cell lung cancer. *J Clin Oncol*. 2004;22:2184-2191.
11. Paez JG, Janne PA, Lee JC, et al. *EGFR* mutations in lung cancer: correlation with clinical response to gefitinib therapy. *Science*. 2004;304:1497-1500.
12. Pao W, Miller V, Zakowski M, et al. *EGF* receptor gene mutations are common in lung cancers from “never smokers” and are associated with sensitivity of tumors to gefitinib and erlotinib. *Proc Natl Acad Sci U S A*. 2004;101:13306-13311.
13. Lynch TJ, Bell DW, Sordella R, et al. Activating mutations in the epidermal growth factor receptor underlying responsiveness of non-small-cell lung cancer to gefitinib. *N Engl J Med*. 2004;350:2129-2139.
14. Thatcher N, Chang A, Parikh P, et al. Gefitinib plus best supportive care in previously treated patients with refractory advanced non-small-cell lung cancer: results from a randomised, placebo-controlled, multicentre study (Iressa Survival Evaluation in Lung Cancer). *Lancet*. 2005;366:1527-1537.



15. Hirsch FR, Varella-Garcia M, Bunn PA Jr, et al. Molecular predictors of outcome with gefitinib in a phase III placebo-controlled study in advanced non-small-cell lung cancer. *J Clin Oncol.* 2006;24:5034-5042.
16. Shepherd FA, Rodrigues PJ, Ciuleanu T, et al. Erlotinib in previously treated non-small-cell lung cancer. *N Engl J Med.* 2005;353:123-132.
17. Tsao MS, Sakurada A, Cutz JC, et al. Erlotinib in lung cancer: molecular and clinical predictors of outcome. *N Engl J Med.* 2005;353:133-144.
18. Zhu CQ, da Cunha SG, Ding K, et al. Role of KRAS and EGFR as biomarkers of response to erlotinib in National Cancer Institute of Canada Clinical Trials Group Study BR.21. *J Clin Oncol.* 2008;26:4268-4275.
19. Han SW, Kim TY, Hwang PG, et al. Predictive and prognostic impact of epidermal growth factor receptor mutation in non-small-cell lung cancer patients treated with gefitinib. *J Clin Oncol.* 2005;23:2493-2501.
20. Kim ES, Hirsh V, Mok T, et al. Gefitinib versus docetaxel in previously treated non-small-cell lung cancer (INTEREST): a randomised phase III trial. *Lancet.* 2008;372:1809-1818.
21. Maruyama R, Nishiwaki Y, Tamura T, et al. Phase III study, V-15-32, of gefitinib versus docetaxel in previously treated Japanese patients with non-small-cell lung cancer. *J Clin Oncol.* 2008;26:4244-4252.
22. Miller VA, Riely GJ, Zakowski MF, et al. Molecular characteristics of bronchioloalveolar carcinoma and adenocarcinoma, bronchioloalveolar carcinoma subtype, predict response to erlotinib. *J Clin Oncol.* 2008;26:1472-1478.
23. Yang C, Shih J, Su W, et al. A phase II study of BIBW 2992 in patients with adenocarcinoma of the lung and activating EGFR/HER1 mutations (LUX-LUNG 2) [abstract]. *Ann Oncol.* 2010;21:viii123. Abstract 367PD.
24. Giaccone G, Gallegos RM, Le CT, et al. Erlotinib for frontline treatment of advanced non-small cell lung cancer: a phase II study. *Clin Cancer Res.* 2006;12:6049-6055.
25. Cappuzzo F, Ligorio C, Janne PA, et al. Prospective study of gefitinib in epidermal growth factor receptor fluorescence in situ hybridization-positive/phospho-Akt-positive or never smoker patients with advanced non-small-cell lung cancer: the ONCOBELL trial. *J Clin Oncol.* 2007;25:2248-2255.
26. Tamura K, Okamoto I, Kashii T, et al. Multicentre prospective phase II trial of gefitinib for advanced non-small cell lung cancer with epidermal growth factor receptor mutations: results of the West Japan Thoracic Oncology Group Trial (WJTOG0403). *Br J Cancer.* 2008;98:907-914.
27. Yang CH, Yu CJ, Shih JY, et al. Specific EGFR mutations predict treatment outcome of stage IIIB/IV patients with chemotherapy-naive non-small-cell lung cancer receiving first-line gefitinib monotherapy. *J Clin Oncol.* 2008;26:2745-2753.
28. Sugio K, Uramoto H, Onitsuka T, et al. Prospective phase II study of gefitinib in non-small cell lung cancer with epidermal growth factor receptor gene mutations. *Lung Cancer.* 2009;64:314-318.
29. Sequist LV, Martins RG, Spigel D, et al. First-line gefitinib in patients with advanced non-small-cell lung cancer harboring somatic EGFR mutations. *J Clin Oncol.* 2008;26:2442-2449.
30. Schneider CP, Heigener D, Schott-von-Romer K, et al. Epidermal growth factor receptor-related tumor markers and clinical outcomes with erlotinib in non-small cell lung cancer: an analysis of patients from German centers in the TRUST study. *J Thorac Oncol.* 2008;3:1446-1453.
31. Mok TS, Wu YL, Thongprasert S, et al. Gefitinib or carboplatin-paclitaxel in pulmonary adenocarcinoma. *N Engl J Med.* 2009;361:947-957.
32. Lee JS, Park K, Kim SW, et al. A randomized phase III study of gefitinib (IRESSA) versus standard chemotherapy (gemcitabine plus cisplatin) as a first-line treatment for never-smokers with advanced or metastatic adenocarcinoma of the lung [abstract]. *J Thorac Oncol.* 2009;4(suppl 1):S283-S284. Abstract PRS.4.
33. Inoue A, Kobayashi K, Usui K, et al. First-line gefitinib for patients with advanced non-small-cell lung cancer harboring epidermal growth factor receptor mutations without indication for chemotherapy. *J Clin Oncol.* 2009;27:1394-1400.
34. Cappuzzo F, Ciuleanu T, Stelmakh L, et al. Erlotinib as maintenance treatment in advanced non-small-cell lung cancer: a multicentre, randomised, placebo-controlled phase 3 study. *Lancet Oncol.* 2010;11:521-529.
35. Yoshida K, Yatabe Y, Park J, et al. Clinical outcomes of advanced non-small cell lung cancer patients screened for epidermal growth factor receptor gene mutations [published online ahead of print September 24, 2009]. *J Cancer Res Clin Oncol.* 2010;136:527-535. doi:10.1007/s00432-009-0685-2.
36. Hirsch FR, Varella-Garcia M, McCoy J, et al. Increased epidermal growth factor receptor gene copy number detected by fluorescence in situ hybridization associates with increased sensitivity to gefitinib in patients with bronchioloalveolar carcinoma subtypes: a Southwest Oncology Group Study. *J Clin Oncol.* 2005;23:6838-6845.
37. Hirsch FR, Varella-Garcia M, Cappuzzo F, et al. Combination of EGFR gene copy number and protein expression predicts outcome for advanced non-small-cell lung cancer patients treated with gefitinib. *Ann Oncol.* 2007;18:752-760.
38. Graziano SL, Gamble GP, Newman NB, et al. Prognostic significance of K-ras codon 12 mutations in patients with resected stage I and II non-small-cell lung cancer. *J Clin Oncol.* 1999;17:668-675.
39. Massarelli E, Varella-Garcia M, Tang X, et al. KRAS mutation is an important predictor of resistance to therapy with epidermal growth factor receptor tyrosine kinase inhibitors in non-small-cell lung cancer. *Clin Cancer Res.* 2007;13:2890-2896.
40. Eberhard DA, Johnson BE, Amler LC, et al. Mutations in the epidermal growth factor receptor and in KRAS are predictive and prognostic indicators in patients with non-small-cell lung cancer treated with chemotherapy alone and in combination with erlotinib. *J Clin Oncol.* 2005;23:5900-5909.
41. Jackman DM, Sequist LV, Cioffredi L, et al. Impact of EGFR and KRAS genotype on outcomes in a clinical trial registry of NSCLC patients initially treated with erlotinib or gefitinib [abstract]. *J Clin Oncol.* 2008;26. Abstract 8035.
42. Khambata-Ford S, Harbison C, Woytowicz D, et al. K-ras mutation (mut), EGFR-related, and exploratory markers as response predictors of cetuximab in first-line advanced NSCLC: retrospective analyses of the BMS099 trial [abstract]. *J Clin Oncol.* 2009;27(suppl):15s. Abstract 8021.
43. Mack PC, Holland WS, Redman M, et al. KRAS mutation analysis in cetuximab-treated advanced stage non-small cell lung cancer (NSCLC): SWOG experience with S0342 and S0536 [abstract]. *J Clin Oncol.* 2009;27(suppl):15s. Abstract 8002.
44. O'Byrne KJ, Bondarenko I, Barrios C, et al. Molecular and clinical predictors of outcome for cetuximab in non-small cell lung cancer (NSCLC): data from the FLEX study [abstract]. *J Clin Oncol.* 2009;27(suppl):15s. Abstract 8007.

45. Brugger W, Triller N, Blasinska-Morawiec M, et al. Biomarker analyses from the phase III placebo-controlled SATURN study of maintenance erlotinib following first-line chemotherapy for advanced NSCLC [abstract]. *J Clin Oncol*. 2009;27(suppl):15s. Abstract 8020.
46. Lievre A, Bachet JB, Le CD, et al. KRAS mutation status is predictive of response to cetuximab therapy in colorectal cancer. *Cancer Res*. 2006;66:3992-3995.
47. Franklin WA, Gandara DR, Kim ES, et al. SWOG S0342 and S0536: expression of EGFR protein and markers of epithelial-mesenchymal transformation (EMT) in cetuximab/chemotherapy-treated non-small cell lung cancer (NSCLC) [abstract]. *J Clin Oncol*. 2009;27(suppl):15s. Abstract 11076.
48. Sequist LV, Joshi VA, Janne PA, et al. Response to treatment and survival of patients with non-small cell lung cancer undergoing somatic EGFR mutation testing. *Oncologist*. 2007;12:90-98.
49. Centers for Disease Control and Prevention. The health consequences of smoking: a report of the Surgeon General. 2004. [http://www.cdc.gov/tobacco/data\\_statistics/sgr/2004/complete\\_report/index.htm](http://www.cdc.gov/tobacco/data_statistics/sgr/2004/complete_report/index.htm). Accessed February 9, 2011.
50. National Comprehensive Cancer Network. NCCN Clinical Practice Guidelines in Oncology. Non-Small Cell Lung Cancer. V.2.2010. [http://www.nccn.org/professionals/physician\\_gls/PDF/nscl.pdf](http://www.nccn.org/professionals/physician_gls/PDF/nscl.pdf). Accessed April 8, 2010.
51. Tiseo M, Rossi G, Capelletti M, et al. Predictors of gefitinib outcomes in advanced non-small cell lung cancer (NSCLC): study of a comprehensive panel of molecular markers [published online ahead of print May 26, 2009]. *Lung Cancer*. 2010;67:355-360. doi:10.1016/j.lungcan.2009.04.021.
52. Hirsch FR, Varella-Garcia M, Bunn PA Jr, et al. Epidermal growth factor receptor in non-small-cell lung carcinomas: correlation between gene copy number and protein expression and impact on prognosis. *J Clin Oncol*. 2003;21:3798-3807.
53. Rivera MP, Mehta AC. Initial diagnosis of lung cancer: ACCP evidence-based clinical practice guidelines (2nd edition). *Chest*. 2007;132(3 suppl):131S-148S.
54. Kim ES, Herbst RS, Lee JJ, et al. The BATTLE trial (Biomarker-integrated Approaches of Targeted Therapy for Lung Cancer Elimination): personalizing therapy for lung cancer. Presented at: the 101st Annual Meeting of the American Association for Cancer Research; April 17-21, 2010; Washington, DC; 2010. Abstract LB-1.
55. Geraghty PR, Kee ST, McFarlane G, et al. CT-guided trans-thoracic needle aspiration biopsy of pulmonary nodules: needle size and pneumothorax rate. *Radiology*. 2003;229:475-481.
56. Cheung YC, Chang JW, Hsieh JJ, et al. Adequacy and complications of computed tomography-guided core needle biopsy on non-small cell lung cancers for epidermal growth factor receptor mutations demonstration: 18-gauge or 20-gauge biopsy needle. *Lung Cancer*. 2010;67:166-169.
57. Otani H, Toyooka S, Soh J, et al. Detection of EGFR gene mutations using the wash fluid of CT-guided biopsy needle in NSCLC patients. *J Thorac Oncol*. 2008;3:472-476.
58. Miller VA, Kris MG, Shah N, et al. Bronchioloalveolar pathologic subtype and smoking history predict sensitivity to gefitinib in advanced non-small-cell lung cancer. *J Clin Oncol*. 2004;22:1103-1109.
59. Sakuma Y, Matsukuma S, Yoshihara M, et al. Distinctive evaluation of nonmucinous and mucinous subtypes of bronchioloalveolar carcinomas in EGFR and K-ras gene-mutation analyses for Japanese lung adenocarcinomas: confirmation of the correlations with histologic subtypes and gene mutations. *Am J Clin Pathol*. 2007;128:100-108.
60. Faber AC, Wong KK, Engelman JA. Differences underlying EGFR and HER2 oncogene addiction [editorial]. *Cell Cycle*. 2010;9:851-852.
61. Yoshida Y, Shibata T, Kokubu A, et al. Mutations of the epidermal growth factor receptor gene in atypical adenomatous hyperplasia and bronchioloalveolar carcinoma of the lung. *Lung Cancer*. 2005;50:1-8.
62. Shigematsu H, Lin L, Takahashi T, et al. Clinical and biological features associated with epidermal growth factor receptor gene mutations in lung cancers. *J Natl Cancer Inst*. 2005;97:339-346.
63. Motoi N, Szoke J, Riely GJ, et al. Lung adenocarcinoma: modification of the 2004 WHO mixed subtype to include the major histologic subtype suggests correlations between papillary and micropapillary adenocarcinoma subtypes, EGFR mutations and gene expression analysis. *Am J Surg Pathol*. 2008;32:810-827.
64. Ohtsuka K, Ohnishi H, Furuyashiki G, et al. Clinico-pathological and biological significance of tyrosine kinase domain gene mutations and overexpression of epidermal growth factor receptor for lung adenocarcinoma. *J Thorac Oncol*. 2006;1:787-795.
65. Zakowski MF, Hussain S, Pao W, et al. Morphologic features of adenocarcinoma of the lung predictive of response to the epidermal growth factor receptor kinase inhibitors erlotinib and gefitinib. *Arch Pathol Lab Med*. 2009;133:470-477.
66. Marchetti A, Martella C, Felicioni L, et al. EGFR mutations in non-small-cell lung cancer: analysis of a large series of cases and development of a rapid and sensitive method for diagnostic screening with potential implications on pharmacologic treatment. *J Clin Oncol*. 2005;23:857-865.
67. Ohtsuka K, Ohnishi H, Fujiwara M, et al. Abnormalities of epidermal growth factor receptor in lung squamous-cell carcinomas, adenocarcinomas, and large-cell carcinomas: tyrosine kinase domain mutations are not rare in tumors with an adenocarcinoma component. *Cancer*. 2007;109:741-750.
68. Sun S, Schiller JH, Gazdar AF. Lung cancer in never smokers: a different disease. *Nat Rev Cancer*. 2007;7:778-790.
69. Westra WH. Early glandular neoplasia of the lung. *Respir Res*. 2000;1:163-169.
70. Pao W, Wang TY, Riely GJ, et al. KRAS mutations and primary resistance of lung adenocarcinomas to gefitinib or erlotinib. *PLoS Med*. 2005;2:e17. doi:10.1371/journal.pmed.0020017.
71. Aviel-Ronen S, Blackhall FH, Shepherd FA, et al. K-ras mutations in non-small-cell lung carcinoma: a review. *Clin Lung Cancer*. 2006;8:30-38.
72. Mao C, Qiu LX, Liao RY, et al. KRAS mutations and resistance to EGFR-TKIs treatment in patients with non-small cell lung cancer: a meta-analysis of 22 studies. *Lung Cancer*. 2010;69:272-278.
73. Linardou H, Dahabreh IJ, Kanaklopiti D, et al. Assessment of somatic k-RAS mutations as a mechanism associated with resistance to EGFR-targeted agents: a systematic review and meta-analysis of studies in advanced non-small-cell lung cancer and metastatic colorectal cancer. *Lancet Oncol*. 2008;9:962-972.
74. Nelson MA, Wymer J, Clements N Jr. Detection of K-ras gene mutations in non-neoplastic lung tissue and lung cancers. *Cancer Lett*. 1996;103:115-121.
75. Rodenhuis S, van de Wetering ML, Mooi WJ, et al. Mutational activation of the K-ras oncogene: a possible pathogenetic factor in adenocarcinoma of the lung. *N Engl J Med*. 1987;317:929-935.

76. John T, Liu G, Tsao MS. Overview of molecular testing in non-small-cell lung cancer: mutational analysis, gene copy number, protein expression and other biomarkers of EGFR for the prediction of response to tyrosine kinase inhibitors. *Oncogene*. 2009;28(suppl 1):S14-S23.
77. Eberhard DA, Giaccone G, Johnson BE. Biomarkers of response to epidermal growth factor receptor inhibitors in Non-Small-Cell Lung Cancer Working Group: standardization for use in the clinical trial setting. *J Clin Oncol*. 2008;26:983-994.
78. Smith LM, Sanders JZ, Kaiser RJ, et al. Fluorescence detection in automated DNA sequence analysis. *Nature*. 1986;321:674-679.
79. Mardis ER. Next-generation DNA sequencing methods. *Annu Rev Genomics Hum Genet*. 2008;9:387-402.
80. Schuster SC. Next-generation sequencing transforms today's biology. *Nat Methods*. 2008;5:16-18.
81. Shackelford W, Deng S, Murayama K, et al. A new technology for mutation detection. *Ann N Y Acad Sci*. 2004;1022:257-262.
82. Danenberg PV, Stephens J, Cooc J, et al. A novel RT-PCR approach to detecting EML4-ALK fusion genes in archival NSCLC tissue [abstract]. *J Clin Oncol*. 2010;28(suppl):15s. Abstract 10535.
83. Response Genetics. ResponseDX: Lung. <http://www.responsegenetics.com/genes#lung>. Accessed February 9, 2011.
84. Whitehall V, Tran K, Umapathy A, et al. A multicenter blinded study to evaluate KRAS mutation testing methodologies in the clinical setting. *J Mol Diagn*. 2009;11:543-552.
85. Angulo B, Garcia-Garcia E, Martinez R, et al. A commercial real-time PCR kit provides greater sensitivity than direct sequencing to detect KRAS mutations: a morphology-based approach in colorectal carcinoma. *J Mol Diagn*. 2010;12:292-299.
86. DxS Diagnostic Innovations. TheraScreen EGFR29 Mutation Kit for the detection of 29 mutations in the epidermal growth factor receptor (EGFR) gene: instructions for use: product codes EG-21 and EG-22. Version DU002a. Revised January 2009. <http://www.labmarketplace.com/docs/ProductDocs/148/IFU-TheraScreen-EGFR29-English.pdf>. Accessed December 28, 2009.
87. Franklin WA, Haney J, Sugita M, et al. KRAS mutation: comparison of testing methods and tissue sampling techniques in colon cancer. *J Mol Diagn*. 2010;12:43-50.
88. Kimura H, Suminoe M, Kasahara K, et al. Evaluation of epidermal growth factor receptor mutation status in serum DNA as a predictor of response to gefitinib (IRESSA) [abstract]. *J Thorac Oncol*. 2007;2(suppl 4):S723. Abstract P3-103.
89. Maheswaran S, Sequist LV, Nagrath S, et al. Detection of mutations in EGFR in circulating lung-cancer cells. *N Engl J Med*. 2008;359:366-377.
90. Varella-Garcia M. Stratification of non-small cell lung cancer patients for therapy with epidermal growth factor receptor inhibitors: the EGFR fluorescence in situ hybridization assay. *Diagn Pathol*. 2006;1:19. doi:10.1186/1746-1596-1-19.
91. Hirsch FR, Varella-Garcia M, Dziadziuszko R, et al. Fluorescence in situ hybridization subgroup analysis of TRIBUTE, a phase III trial of erlotinib plus carboplatin and paclitaxel in non-small cell lung cancer. *Clin Cancer Res*. 2008;14:6317-6323.
92. Gallegos Ruiz MI, Floor K, Vos W, et al. Epidermal growth factor receptor (EGFR) gene copy number detection in non-small-cell lung cancer; a comparison of fluorescence in situ hybridization and chromogenic in situ hybridization. *Histopathology*. 2007;51:631-637.
93. Sholl LM, John IA, Chou YP, et al. Validation of chromogenic in situ hybridization for detection of EGFR copy number amplification in nonsmall cell lung carcinoma. *Mod Pathol*. 2007;20:1028-1035.
94. Yoo SB, Lee HJ, Park JO, et al. Reliability of chromogenic in situ hybridization for epidermal growth factor receptor gene copy number detection in non-small-cell lung carcinomas: a comparison with fluorescence in situ hybridization study. *Lung Cancer*. 2010;67:301-305.
95. Chang JW, Liu HP, Hsieh MH, et al. Increased epidermal growth factor receptor (EGFR) gene copy number is strongly associated with EGFR mutations and adenocarcinoma in non-small cell lung cancers: a chromogenic in situ hybridization study of 182 patients. *Lung Cancer*. 2008;61:328-339.
96. Daniele L, Macri L, Schena M, et al. Predicting gefitinib responsiveness in lung cancer by fluorescence in situ hybridization/chromogenic in situ hybridization analysis of EGFR and HER2 in biopsy and cytology specimens. *Mol Cancer Ther*. 2007;6:1223-1229.
97. Soda M, Choi YL, Enomoto M, et al. Identification of the transforming EML4-ALK fusion gene in non-small-cell lung cancer. *Nature*. 2007;448:561-566.
98. Wong DW, Leung EL, So KK, et al. The EML4-ALK fusion gene is involved in various histologic types of lung cancers from nonsmokers with wild-type EGFR and KRAS. *Cancer*. 2009;115:1723-1733.
99. Inamura K, Takeuchi K, Togashi Y, et al. EML4-ALK fusion is linked to histological characteristics in a subset of lung cancers. *J Thorac Oncol*. 2008;3:13-17.
100. Inamura K, Takeuchi K, Togashi Y, et al. EML4-ALK lung cancers are characterized by rare other mutations, a TTF-1 cell lineage, an acinar histology, and young onset. *Mod Pathol*. 2009;22:508-515.
101. Koivunen JP, Mermel C, Zejnullahu K, et al. EML4-ALK fusion gene and efficacy of an ALK kinase inhibitor in lung cancer. *Clin Cancer Res*. 2008;14:4275-4283.
102. Shaw AT, Yeap BY, Mino-Kenudson M, et al. Clinical features and outcome of patients with non-small-cell lung cancer who harbor EML4-ALK. *J Clin Oncol*. 2009;27:4247-4253.
103. Shaw AT, Costa DB, Iafrate AJ, et al. Clinical activity of the oral ALK and MET inhibitor PF-02341066 in non-small lung cancer (NSCLC) with EML4-ALK translocations [abstract]. *J Thorac Oncol*. 2009;4(suppl 1):S305. Abstract A6.4.
104. Takeuchi K, Choi YL, Soda M, et al. Multiplex reverse transcription-PCR screening for EML4-ALK fusion transcripts. *Clin Cancer Res*. 2008;14:6618-6624.
105. Travis WD, Brambilla E, Noguchi M, et al. International Association for the Study of Lung Cancer/American Thoracic Society/European Respiratory Society international multidisciplinary classification of lung adenocarcinoma. *J Thorac Oncol*. 2011;6:244-285.

# First and Only FDA Cleared Digital Cytology System

**Genius™ Cervical AI**

**Genius™ Review Station**

**Genius™ Digital Imager**

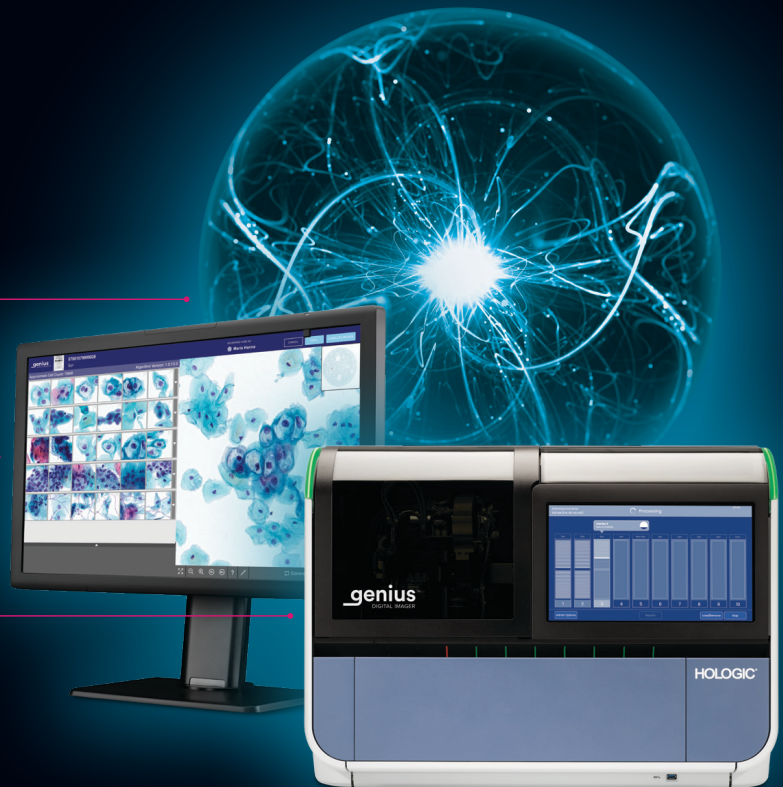

## Empower Your Genius With Ours

**Make a Greater Impact on Cervical Cancer**  
with the Advanced Technology of the  
Genius™ Digital Diagnostics System

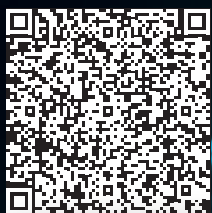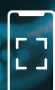

Click or Scan  
to discover more

ADS-04159-001 Rev 001 © 2024 Hologic, Inc. All rights reserved. Hologic, Genius, and associated logos are trademarks and/or registered trademarks of Hologic, Inc. and/or its subsidiaries in the United States and/or other countries. This information is intended for medical professionals in the U.S. and other markets and is not intended as a product solicitation or promotion where such activities are prohibited. Because Hologic materials are distributed through websites, podcasts and tradeshows, it is not always possible to control where such materials appear. For specific information on what products are available for sale in a particular country, please contact your Hologic representative or write to [diagnostic.solutions@hologic.com](mailto:diagnostic.solutions@hologic.com).

**genius™**  
DIGITAL DIAGNOSTICS
